# Supplementary material
Source: publisher site journal article supplement (http://www.e-cmh.org/upload/media/cmh-2020-0333-suppl5.pdf)
Supplement: Supplementary file 1 [file cmh-2020-0333-suppl5.pdf]

**Supplementary Table 5.** Sensitivity analysis of Liang score to predict HCC risk of cirrhotic and non-cirrhotic patients in the validation cohort

|                          | <b>Cirrhotic patients</b> | <b>Non-cirrhotic patients</b> |
|--------------------------|---------------------------|-------------------------------|
| Sensitivity              | 91.7 (71.5–98.5)          | 83.3 (36.5–99.1)              |
| Specificity              | 42.6 (39.4–45.9)          | 68.9 (67.2–70.4)              |
| NPV                      | 99.5 (98.0–99.9)          | 99.9 (99.7–99.9)              |
| PPV                      | 4.0 (2.6–6.0)             | 0.5 (0.2–1.2)                 |
| No of high risk patients | 554 (58.3)                | 1,040 (31.2)                  |
| HCC predicted            | 22 (91.7)                 | 5 (83.3)                      |

Values are presented as percentage (95% confidence interval) or number (%).

HCC, hepatocellular carcinoma; NPV, negative predictive value; PPV, positive predictive value.
